# Supplementary material
Source: PubMed Central journal article supplement (PMC3772501)
Supplement: supp_blood-2013-04-496778_blood-2013-04-496778-1.pdf [file supp_blood-2013-04-496778_blood-2013-04-496778-1.pdf]

## Supplemental Data

**Table 1s. Adjusted 3-Year Cumulative Incidences of TRM, Relapse, and 3-Year Probabilities of DFS and Survival in Adult Patients with Primary MDS who Underwent HLA-Identical Sibling (MRD) HCT or 8/8 or 7/8 Matched Unrelated Donor (MUD) HCT from 2002-2006.**

|          | <b>MRD<br/>Probability<br/>(95% CI)</b> | <b>8/8 MUD<br/>Probability<br/>(95% CI)</b> | <b>7/8 MUD<br/>Probability<br/>(95% CI)</b> | <b>8/8 MUD vs. MRD<br/>P value‡</b> | <b>7/8 MUD vs. MRD<br/>P value‡</b> | <b>7/8 MUD vs. 8/8 MUD<br/>P value‡</b> |
|----------|-----------------------------------------|---------------------------------------------|---------------------------------------------|-------------------------------------|-------------------------------------|-----------------------------------------|
| TRM      | 29 (21-37)                              | 43 (38-48)                                  | 43 (32-53)                                  | 0.004                               | 0.03                                | 0.96                                    |
| Relapse  | 31 (23-39)                              | 22 (18-27)                                  | 23 (15-33)                                  | 0.056                               | 0.20                                | 0.79                                    |
| DFS      | 41 (33-50)                              | 35 (30-40)                                  | 32 (23-42)                                  | 0.20                                | 0.15                                | 0.58                                    |
| Survival | 50 (41-58)                              | 38 (33-43)                                  | 35 (25-44)                                  | 0.01                                | 0.02                                | 0.57                                    |

‡Pointwise pairwise comparison

**Table 2s. Causes of death in adult MDS patients who underwent HLA-identical sibling (MRD) HCT or 8/8 or 7/8 matched unrelated donor (MUD) HCT**

|                          | <b>MRD</b> | <b>8/8 MUD</b> | <b>7/8 MUD</b> |
|--------------------------|------------|----------------|----------------|
| Missing                  | 1 (<1)     | 2 (<1)         | 1 (1)          |
| Graft Rejection          | 1 (<1)     | 8 (3)          | 4 (5)          |
| Infection                | 14 (13)    | 42 (17)        | 13 (16)        |
| Interstitial pneumonitis | 6 (6)      | 10 (4)         | 4 (5)          |
| ARDS                     | 1 (<1)     | 5 (2)          | 2 (2)          |
| GVHD                     | 22 (21)    | 42 (17)        | 14 (17)        |
| Primary disease          | 38 (35)    | 72 (28)        | 23 (28)        |
| Organ failure            | 10 (9)     | 28 (11)        | 12 (15)        |
| Secondary malignancy     | 0          | 1 (<1)         | 0              |
| Hemorrhage               | 6 (6)      | 8 (3)          | 0              |
| Accidental death         | 0          | 1 (<1)         | 0              |
| Vascular                 | 0          | 1 (<1)         | 0              |
| Toxicity                 | 0          | 16 (6)         | 3 (4)          |
| Other cause              | 8 (7)      | 17 (7)         | 6 (7)          |
| Total                    | 107        | 253            | 82             |

Unless otherwise indicated, all values are no. (%). ARDS- acute respiratory distress syndrome.
